# Supplementary material
Source: Springer Nature journal article supplement (https://www.springermedizin.de/resource/supplementary/12943_2007_291_MOESM4_ESM.pdf/9553872)

Serum BGLAP levels  
[ng/ml]

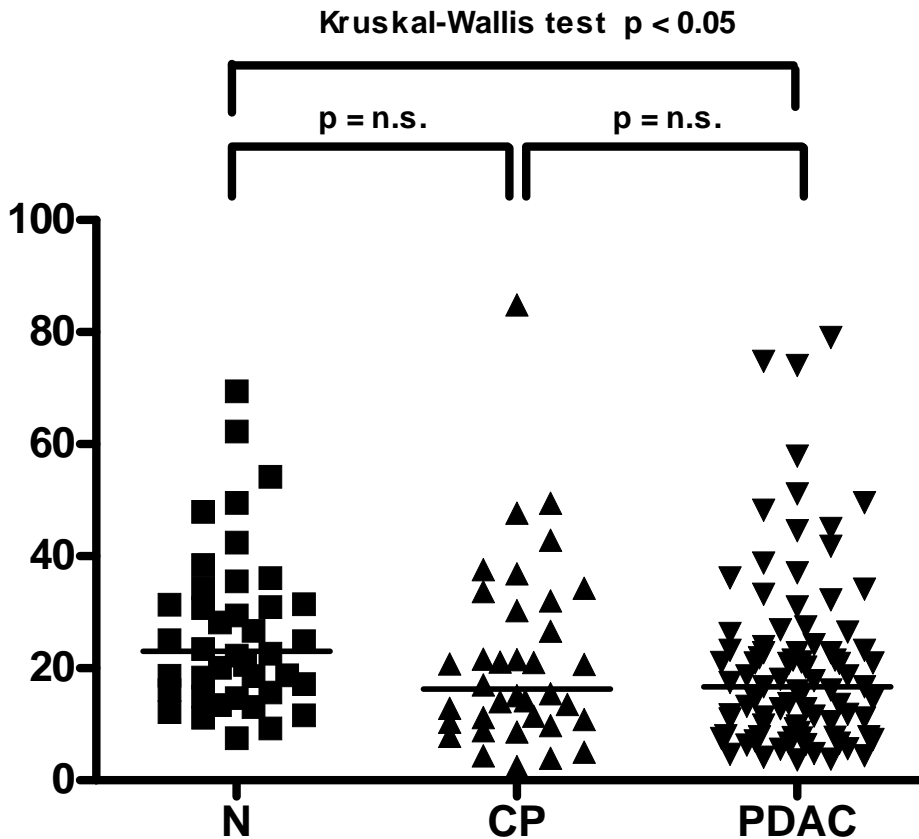

Supplement: MOESM4 [file 9553872]
